# Supplementary material
Source: publisher figshare collection journal article supplement (https://sage.figshare.com/ndownloader/files/14884109)
Supplement: Supplementary file 1 [file 14884109]

**Supplementary Table S1. Characteristics of the included studies**

| Study                            | Sample size      | Demographic and clinical features of participants |                  |                                    |                    |                    |      | Intervention                                                                                                                                                                                |                                |                                                                 |                                 |                                                             |
|----------------------------------|------------------|---------------------------------------------------|------------------|------------------------------------|--------------------|--------------------|------|---------------------------------------------------------------------------------------------------------------------------------------------------------------------------------------------|--------------------------------|-----------------------------------------------------------------|---------------------------------|-------------------------------------------------------------|
|                                  |                  | Total                                             | Ages in years,   | Time since stroke                  | Paretic side       | Experimental group |      | Control group                                                                                                                                                                               | Treatment                      | Outcome                                                         | Video                           |                                                             |
|                                  |                  | (EG/CG)                                           | mean (SD)        | onset in days/<br>[weeks]/"months" | (n: right/left)    |                    |      |                                                                                                                                                                                             | dosage                         | measures                                                        | types                           |                                                             |
|                                  |                  |                                                   |                  | mean (SD)                          |                    | EG                 | CG   |                                                                                                                                                                                             |                                |                                                                 |                                 |                                                             |
| Bang DH<br>2013 <sup>18</sup>    | 30<br>(15/15)    | 64.1<br>(6.35)                                    | 58.9<br>(7.03)   | "14.1"<br>(3.78)                   | "12.6"<br>(3.86)   | 8/7                | 6/9  | Action observation therapy<br>(watching videos for 9<br>minutes + Treadmill training<br>for 30 minutes)                                                                                     | Sham action<br>observation     | 40 min/day, 5<br>day/week, for<br>4 weeks                       | TUG;<br>10MWT;<br>6MWT;<br>KASW | Treadmill<br>training                                       |
| Cowles T<br>2013 <sup>5</sup>    | 22<br>(9/13)     | 78.8<br>(8.1)                                     | 75.6<br>(12.4)   | 19.5<br>(7.0)                      | 17.8<br>(5.1)      | 1/8                | 6/7  | Conventional rehabilitation<br>+ action observation therapy<br>(watching the therapist<br>performing the actions for 2<br>minutes and then practicing<br>the actions for 4 to 6<br>minutes) | Conventional<br>rehabilitation | 30<br>min/session, 2<br>sessions/day,<br>for 15 working<br>days | MI; ARAT                        | Functional<br>tasks (e.g.,<br>bring<br>telephone<br>to ear) |
| Dettmers C<br>2014 <sup>26</sup> | 56<br>(19/19/18) | 62.79<br>(N/A)                                    | 58.83<br>(11.25) | "37.91"<br>(69.96)                 | "26.74"<br>(61.69) | 11/8               | 12/6 | Conventional rehabilitation<br>+ action observation therapy<br>(watching each video clip<br>for 5 minutes and then                                                                          | Conventional<br>rehabilitation | 1 hour/day, for<br>6 weeks                                      | WMFT;<br>NHPT;<br>MAL; SIS      | Functional<br>tasks (e.g.,<br>grasping<br>and lifting       |

|                                     |               |                 |                  |                    |                   |       |       |                                                                                                                                                                                  |                                                                |                                                                     |                                                       |                                                                 |
|-------------------------------------|---------------|-----------------|------------------|--------------------|-------------------|-------|-------|----------------------------------------------------------------------------------------------------------------------------------------------------------------------------------|----------------------------------------------------------------|---------------------------------------------------------------------|-------------------------------------------------------|-----------------------------------------------------------------|
|                                     |               |                 |                  |                    |                   |       |       | practice the same actions)                                                                                                                                                       |                                                                |                                                                     |                                                       | a glass)                                                        |
| Ertelt D<br>2007 <sup>2</sup>       | 16<br>(8/8)   | 57.16<br>(8.73) | 55.40<br>(10.77) | 1472.9<br>(1258.8) | 724.8<br>(360.9)  | 2/6   | 2/6   | Action observation therapy<br>(watching the videos for 6<br>minutes, and then<br>performing the actions for 6<br>minutes; each action was<br>presented twice)                    | Sham action<br>observation                                     | 90 min/day,<br>for 18 working<br>days                               | FAT;<br>WMFT;<br>SIS                                  | Functional<br>tasks (e.g.,<br>the use of a<br>ball or a<br>cup) |
| Franceschini<br>M 2012 <sup>6</sup> | 90<br>(48/42) | 65.7<br>(11.9)  | 67.0<br>(12.4)   | 29.5 (4.2)         | 31.0 (4.6)        | 22/26 | 18/24 | Conventional rehabilitation<br>+ action observation therapy<br>(watching the videos for 3<br>minutes and then performing<br>the actions for 2 minutes, for<br>3 motor sequences) | Conventional<br>rehabilitation +<br>sham action<br>observation | 15<br>min/session,<br>2 sessions/day,<br>5 day/week,<br>for 4 weeks | BBT; FAT;<br>FMA;<br>MAS; FIM                         | Functional<br>tasks (e.g.,<br>drinking<br>from a<br>glass)      |
| Fu J 2017 <sup>7</sup>              | 53<br>(28/25) | 62.04<br>(9.93) | 59.76<br>(10.57) | 39.49<br>(18.45)   | 41.12<br>(18.79)  | 12/16 | 13/12 | Conventional rehabilitation<br>+ action observation therapy<br>(watching the videos for 10<br>minutes and then practicing<br>the actions for 10 minutes)                         | Conventional<br>rehabilitation +<br>sham action<br>observation | 20 min/day,<br>6 day/week,<br>for 8 weeks                           | FMA;<br>WMFT;<br>MBI;<br>Motor<br>evoked<br>potential | Upper-limb<br>movements                                         |
| Kim CH<br>2016 <sup>19</sup>        | 22<br>(11/11) | 60.77<br>(7.03) | 59.11<br>(7.05)  | [12.89]<br>(2.93)  | [11.33]<br>(2.96) | 5/6   | 5/6   | Conventional rehabilitation<br>+ action observation therapy<br>(watching videos for 9<br>minutes, a break for 1<br>minute, and practicing the                                    | Conventional<br>rehabilitation +<br>task-oriented<br>training  | 40 min/day, 5<br>time/week, for<br>4 weeks                          | FMA;<br>BBT; MBI;<br>MAS                              | Functional<br>tasks (e.g.,<br>folding up<br>a towel)            |

|                           |               |                 |                 |                    |                    |     |     |                                                                                                                                                              |                                                                                               |                                                          |                                |                                                           |
|---------------------------|---------------|-----------------|-----------------|--------------------|--------------------|-----|-----|--------------------------------------------------------------------------------------------------------------------------------------------------------------|-----------------------------------------------------------------------------------------------|----------------------------------------------------------|--------------------------------|-----------------------------------------------------------|
|                           |               |                 |                 |                    |                    |     |     | tasks for 30 minutes)                                                                                                                                        |                                                                                               |                                                          |                                |                                                           |
| Kim E 2015 <sup>8</sup>   | 12<br>(6/6)   | N/A             |                 | N/A                |                    | N/A |     | Conventional rehabilitation + action observation therapy (no report on detailed observation time)                                                            | Conventional rehabilitation + performing the actions without watching videos                  | 30 min/day, 5 day/week, for 6 weeks                      | WMFT                           | Functional tasks (e.g., feeding)                          |
| Kim JC 2018 <sup>20</sup> | 21<br>(11/10) | 57.08<br>(7.29) | 52.92<br>(8.21) | “37.08”<br>(32.45) | “38.92”<br>(31.92) | 4/7 | 3/7 | Action observation therapy (watching videos for 2.5 minutes and practicing the action for 12.5 minutes)                                                      | Sham action observation                                                                       | 15 min/session, 2 sessions/day, 3 time/week, for 6 weeks | WDI; LOS; TUG; DGI             | Balance training, walking                                 |
| Kim JH 2013 <sup>21</sup> | 27<br>(9/9/9) | 55.3<br>(12.1)  | 59.8<br>(8.9)   | “8.3”<br>(3.3)     | “8.5”<br>(3.6)     | 6/3 | 3/6 | Neurodevelopmental therapy + action observation therapy (watching video for 20 minutes and practicing for 10 minutes)                                        | Neurodevelopmental therapy                                                                    | 30 min/day, 5 time/week, for 4 weeks                     | TUG; FRT; WAQ; gait parameters | Balance training, walking (e.g., stepping over obstacles) |
| Kim JS 2012 <sup>22</sup> | 30<br>(15/15) | 64.1<br>(8.3)   | 65.5<br>(7.7)   | “4.6”<br>(1.3)     | “4.1”<br>(1.0)     | 8/7 | 8/7 | Conventional rehabilitation + action observation therapy (watching 5 different kinds of video clips in walking for 10 minutes and practicing for 10 minutes) | Conventional rehabilitation + watching a video in which they were taken through a progressive | 20 min/day                                               | Gait parameters                | Sit-to-stand, balance training, walking                   |

|                               |               |                  |                  |                    |                    |      |      |                                                                                                                                                                                                                                                                      |                                                                                                                                                                   |                                           |                                                 |                                                                        |
|-------------------------------|---------------|------------------|------------------|--------------------|--------------------|------|------|----------------------------------------------------------------------------------------------------------------------------------------------------------------------------------------------------------------------------------------------------------------------|-------------------------------------------------------------------------------------------------------------------------------------------------------------------|-------------------------------------------|-------------------------------------------------|------------------------------------------------------------------------|
| Oh SJ 2019 <sup>27</sup>      | 35            | 58.85            | 59.35            | “5.81”             | “5.66”             | 12/5 | N/A  | Functional action                                                                                                                                                                                                                                                    | relaxation program                                                                                                                                                |                                           |                                                 |                                                                        |
|                               | (17/18)       | (7.60)           | (9.39)           | (0.87)             | (0.94)             |      |      | observation therapy<br>(watching videos for 15<br>minutes and practicing for<br>15 minutes)                                                                                                                                                                          | General action<br>observation therapy<br>(watching videos<br>for 15 minutes, e.g.,<br>looking at the front<br>while walking, and<br>practicing for 15<br>minutes) | 30 min/day                                | Gait<br>parameters, (e.g.,<br>FGA               | Walking<br>around the<br>hospital)                                     |
| Park EC<br>2015 <sup>23</sup> | 40<br>(20/20) | 51.15<br>(14.81) | 48.65<br>(12.81) | “14.91”<br>(6.1)   | “13.4”<br>(8.2)    | 11/9 | 9/11 | Conventional rehabilitation<br>+ action observation therapy<br>(each training set including<br>watching videos for 3<br>minutes, taking 1 minute<br>break, and walking training<br>for 5 minutes. The walking<br>training took a total of 20<br>minutes per session) | Conventional<br>rehabilitation +<br>shame action<br>observation                                                                                                   | 30 min/day, 5<br>day/week,<br>for 8 weeks | Static<br>standing<br>balance;<br>TUG;<br>10MWT | Walking<br>(e.g.,<br>walking on<br>a flat land)                        |
| Park HJ<br>2017 <sup>24</sup> | 25<br>(12/13) | 57.33<br>(6.89)  | 55.08<br>(8.12)  | “33.58”<br>(24.67) | “21.15”<br>(12.44) | 5/7  | 9/4  | Conventional rehabilitation<br>+ action observation therapy<br>(no report on detailed<br>observation time)                                                                                                                                                           | Conventional<br>rehabilitation +<br>shame action<br>observation                                                                                                   | 30 min/day, 3<br>day/week,<br>for 4 weeks | 10MWT;<br>CWT;<br>ABC;<br>Gait<br>parameters    | Communit<br>y-based<br>ambulation<br>(e.g.,<br>walking in<br>a parking |

|                               |               |                  |                  |                    |                    |       |       |                                                                                                                                                                                  |                                                                 |                                                                     |                                                    |                                                                                         |
|-------------------------------|---------------|------------------|------------------|--------------------|--------------------|-------|-------|----------------------------------------------------------------------------------------------------------------------------------------------------------------------------------|-----------------------------------------------------------------|---------------------------------------------------------------------|----------------------------------------------------|-----------------------------------------------------------------------------------------|
| Park HR<br>2014 <sup>25</sup> | 21<br>(11/10) | 55.91<br>(9.1)   | 54.80<br>(12.22) | “21.09”<br>(16.66) | “25.60”<br>(19.67) | 4/7   | 4/6   | Conventional rehabilitation<br>+ action observation therapy<br>(watching video clips<br>demonstrating 4 tasks for<br>functional walking for 10<br>minutes)                       | Conventional<br>rehabilitation +<br>shame action<br>observation | 30 min/day, 3<br>day/week,<br>for 4 weeks                           | 10MWT;<br>F8WT;<br>DGI; Gait<br>symmetry<br>scores | Weight<br>shifting,<br>walking<br>(e.g.,<br>walking on<br>straight<br>paths)            |
| Sale P 2014 <sup>4</sup>      | 67<br>(33/34) | 66.5 (12.7)      |                  | 29.6 (4.5)         |                    |       | 30/37 | Conventional rehabilitation<br>+ action observation therapy<br>(watching the videos for 3<br>minutes and then performing<br>the actions for 2 minutes, for<br>3 motor sequences) | Conventional<br>rehabilitation +<br>sham action<br>observation  | 15<br>min/session,<br>2 sessions/day,<br>5 day/week,<br>for 4 weeks | FMA; BBT                                           | Functional<br>tasks (e.g.,<br>drinking a<br>cup of<br>coffee)                           |
| Zhu MH<br>2015 <sup>10</sup>  | 61<br>(31/30) | 57.75<br>(15.57) | 56.89<br>(14.93) | 30.67<br>(17.85)   | 31.54<br>(18.79)   | 17/14 | 17/13 | Conventional rehabilitation<br>+ action observation therapy<br>(watching each video for 50<br>seconds and then practicing<br>the actions)                                        | Conventional<br>rehabilitation                                  | 30 min/day,<br>6 day/week,<br>for 8 weeks                           | FMA; BI;<br>MAS                                    | Range of<br>motion<br>exercises,<br>functional<br>tasks (e.g.,<br>handling of<br>a pen) |

Abbreviations: 6MWT, 6-Minute Walk Test; 10MWT, 10-Meter Walk Test; ABC, Activities-specific Balance Confidence scale; ARAT, Action Research Arm Test; BBT, Box and Block Test; BI, Barthel Index; CG, Control group; CWT, Community Walk Test; DGI, Dynamic Gait Index; EG, Experimental group; FAC, Functional Ambulation Category; FAT, Frenchay Arm Test; FGA, Functional Gait Assessment; FIM, Functional Independence Measure; FMA, Fugl-Meyer Assessment; FRT, Functional Reaching

Test; KASW, knee angle in swing phase during walking; MAS, Modified Ashworth scale; MBI, modified Barthel Index; MI, Motricity Index; min, minutes; NHPT, Nine Hole Peg Test; SIS, Stroke Impact Scale; TUG, the Timed Up and Go test; WAQ, Walking Ability Questionnaire; WDI, Weight Distribution Index; WMFT, Wolf Motor Function Test.

Note. N/A indicates not available.
